# Supplementary material
Source: PubMed Central journal article supplement (PMC4188684)
Supplement: supp_140147_lee-stroke-at-1.pdf [file supp_140147_lee-stroke-at-1.pdf]

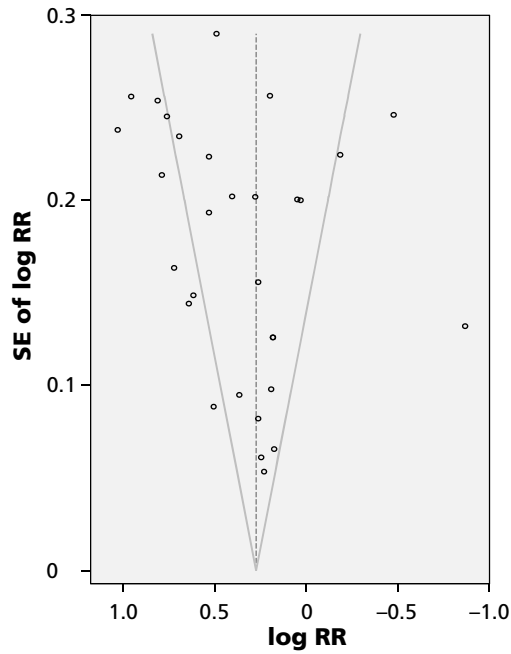

**Appendix 1: Begg funnel plot, with pseudo 95% confidence limits, for the assessment of publication bias in studies examining the effect of cognitive impairment at baseline on the risk of future stroke. Each point represents 1 study or study subgroup; the dashed vertical line is the overall estimated risk ratio (RR).**
